# Supplementary material for: Nearly compensated ferrimagnetic behaviour and giant exchange bias of hexagonal Mn2PtAl: experimental and theoretical studies
Source: Royal Society of Chemistry journal article supplement (doi:10.1039/d2cp02643k), 2022-01-01

## Nearly compensated ferrimagnetism and giant exchange bias in $\text{Mn}_2\text{PtAl}$ : Experiment and theory

Akhilesh Kumar Patel<sup>a,b</sup>, S. Shanmukharao Samatham<sup>\*c</sup>, Alexey V. Lukoyanov<sup>d,e</sup>, P. D. Babu<sup>f</sup> and K. G. Suresh<sup>a</sup>

<sup>a</sup>Magnetic Materials Laboratory, Department of Physics, Indian Institute of Technology Bombay, Mumbai 400 076, Maharashtra, India

<sup>b</sup>Department of Materials Science and Engineering, Faculty of Engineering, Tel Aviv University, Tel Aviv 69978, Israel

<sup>c</sup>Department of Physics, Chaitanya Bharathi Institute of Technology, Gandipet, Hyderabad 500 075, India

<sup>d</sup>M. N. Miheev Institute of Metal Physics of Ural Branch of Russian Academy of Sciences, 620108 Ekaterinburg, Russia

<sup>e</sup>Ural Federal University, 620002, Ekaterinburg, Russia

<sup>f</sup>UGC-DAE Consortium for Scientific Research, Mumbai Center, BARC Campus, Mumbai 400085, India

\* E-mail: [shanmukharao\\_physics@cbit.ac.in](mailto:shanmukharao_physics@cbit.ac.in)

EDS Spectra- We have recorded EDS spectra at two different places on the sample as shown below and composition found nearly same as reported in main manuscript.

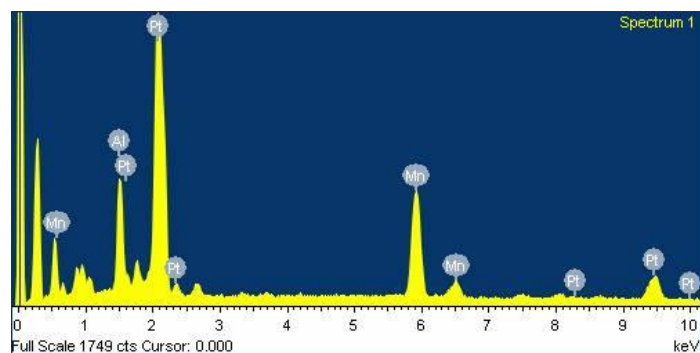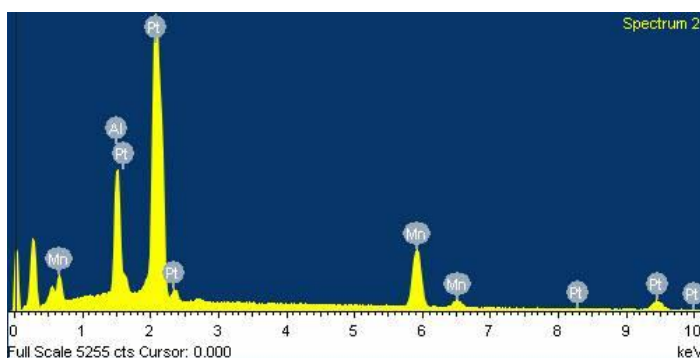

Supplement: d2cp02643k1.pdf [file d2cp02643k1.pdf]
